# Supplementary material
Source: PubMed Central journal article supplement (PMC4790478)
Supplement: lowe006558.wt2_default.pdf [file lowe006558.wt2_default.pdf]

**Table 2** Incidence of reported side effects

| <b>Side effects</b> | <b>Dose</b> | <b>Study</b> | <b>Incidence(%)<br/>Placebo group</b> | <b>Incidence (%)<br/>Intervention<br/>group</b> |
|---------------------|-------------|--------------|---------------------------------------|-------------------------------------------------|
| Paraesthesia        | 250mg       | Basnyat 2003 | 3.7                                   | 48.6                                            |
|                     |             | Basnyat 2006 | 31.0                                  | 76.0                                            |
|                     | 500mg       | Chow 2005    | 0.0                                   | 35.0                                            |
|                     |             | Gertsch 2004 | 10.0                                  | 72.0                                            |
|                     | 750mg       | Basnyat 2006 | 31.0                                  | 91.0                                            |
| Polyuria            | 250mg       | Basnyat 2006 | 53.0                                  | 55.0                                            |
|                     | 500mg       | Chow 2005    | 35.0                                  | 20.0                                            |
|                     |             | Gertsch 2004 | 2.0                                   | 8.0                                             |
|                     | 750mg       | Basnyat 2006 | 53.0                                  | 60.0                                            |
|                     | Larson 1982 | 0.0          | 15.3                                  |                                                 |
| Rash                | 250mg       | Basnyat 2006 | 0.0                                   | 3.0                                             |
|                     | 500mg       | Chow 2005    | 0.0                                   | 0.0                                             |
|                     |             | Gertsch 2004 | 1.0                                   | 0.0                                             |
|                     | 750mg       | Basnyat 2006 | 0.0                                   | 5.0                                             |
| Dysgeusia           | 250mg       | Basnyat 2006 | 4.0                                   | 4.0                                             |
|                     | 500mg       | Chow 2005    | 10.0                                  | 10.0                                            |
|                     |             | Gertsch 2004 | 2.0                                   | 11.0                                            |
|                     | 750mg       | Basnyat 2006 | 4.0                                   | 14.0                                            |
