# Supplementary material
Source: PubMed Central journal article supplement (PMC4790478)
Supplement: lowe006558.wt3_default.pdf [file lowe006558.wt3_default.pdf]

| Dose         | Studies      | Placebo      |       | Intervention |       |
|--------------|--------------|--------------|-------|--------------|-------|
|              |              | Non-adherent | Total | Non-adherent | Total |
| <b>250mg</b> | Basnyat 2003 | 3 (3.7%)     | 81    | 14 (18.9%)   | 74    |
|              | Basnyat 2006 | 10 (19%)     | 52    | 7 (12%)      | 59    |
|              | Gertsch 2010 | 12 (18.5%)   | 65    | 18 (18.6%)   | 97    |
| <b>500mg</b> | Basnyat 2011 | 7 (10.9%)    | 64    | 8 (8.4%)     | 95    |
|              | Gertsch 2004 | 6 (5%)       | 119   | 5 (4%)       | 118   |
| <b>750mg</b> | Basnayt 2006 | 10 (9%)      | 52    | 11 (16%)     | 67    |

**Table 3** Incidence of non-adherence to drug schedule for dose-specific subgroups
