# Supplementary material
Source: PubMed Central journal article supplement (PMC4790478)

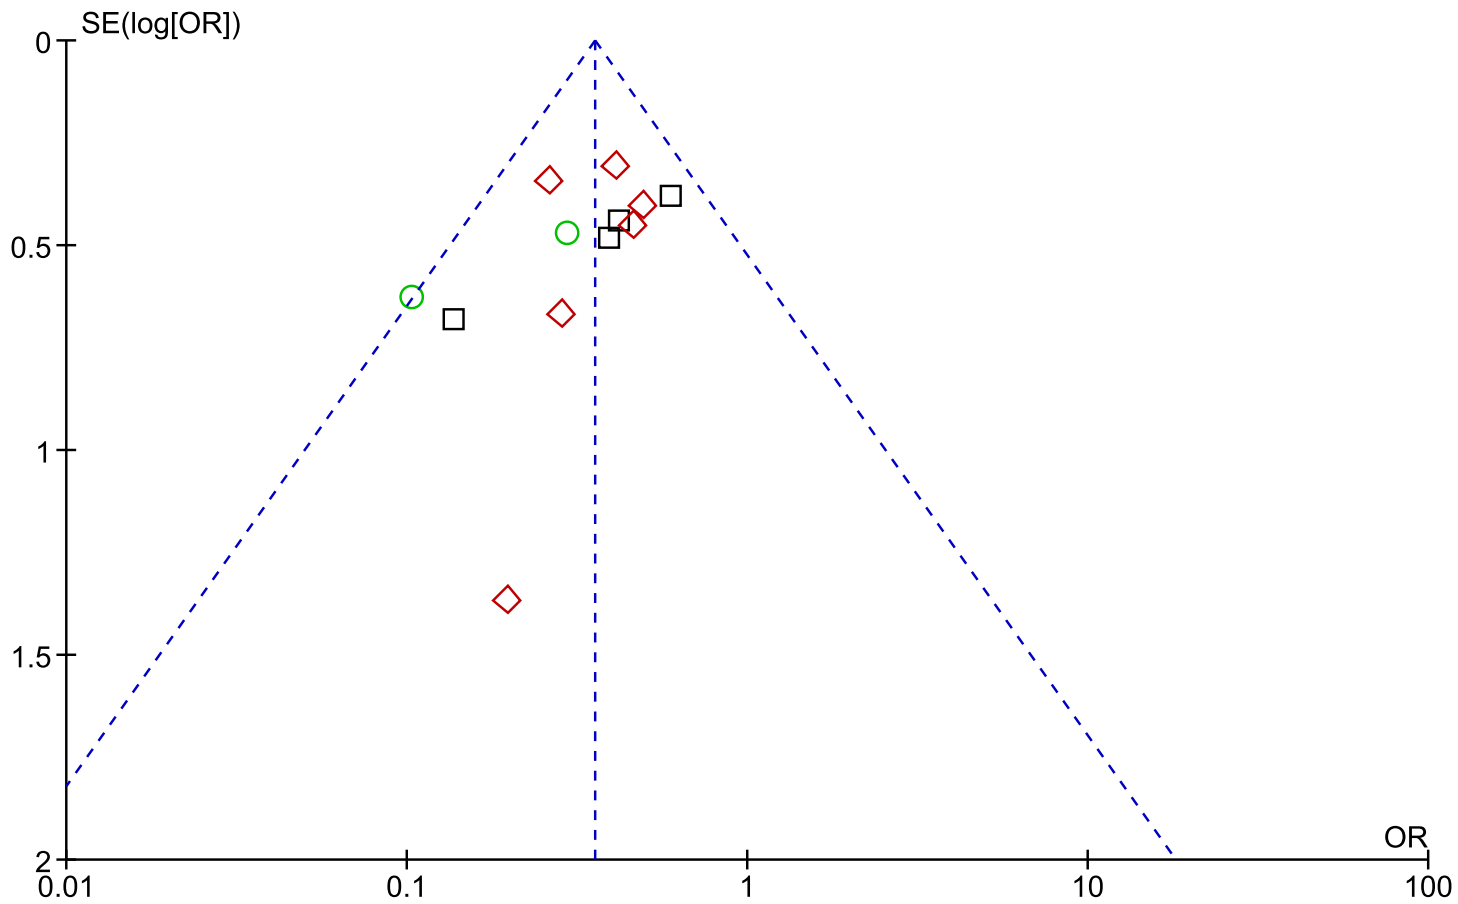

**Subgroups**

□ 250mg    ◇ 500mg    ○ 750mg

Supplement: lowe006558.wf1_default.pdf [file lowe006558.wf1_default.pdf]
